# Supplementary material
Source: PubMed Central journal article supplement (PMC5129730)
Supplement: supp_pp.16.01519_PP2016-01519DR1_Supplemental_Figure_1.pdf [file supp_pp.16.01519_PP2016-01519DR1_Supplemental_Figure_1.pdf]

```

RcTric 1 -----MEQQQQGNGVVMGKRFIQQIQAQKMKELNNGFQSMWKSQKSLAVEAAVVTATSATGGAAGTACMGILAPDISSSLTPPPD--HALNPQAMASHKQQAALGGGLVQARNFVMTGYNAGISSVKKRLRG--KEDVQSSMVAAFGSG
SmTric 1 -----GSLTEMAVAVERLQCLLAGRQWENQSAFVEMVMTAGCAAGGATGCGMGTADAAAGAPMGHQLPTNPDQAVVNLDFQNGGPPQARNFVMTGYNAGISSVKKRLRG--KEDVQSSMVAAFGSG
AtTric1 1 --MVVGGGGGGDKRRSSGEMMAMASLFDNDQNIQDFVQKAEVITNFKWMSKQSTPVEAAVVTATSGELGGAIGMGLIGLSPMP-----Q-HGVDVPOAMASHKQQAALGGGLVQARNFVMTGYNAGISSVKKRLRG--KEDVQSSMVAAFGSG
AtTric2 1 ---MGKDGEGDKKR---ETMAVMSLMKDOONPIQDFVQKAEVITNFKWMSKQSTPVEAAVVTATSGELGGAIGMGLIGLSPMP-----Q-HGVDVPOAMASHKQQAALGGGLVQARNFVMTGYNAGISSVKKRLRG--KEDVQSSMVAAFGSG
BrTric1 1 ---MGKDGEGDKKRGGDETHAVMSLMKDOONPIQDFVQKAEVITNFKWMSKQSTPVEAAVVTATSGELGGAIGMGLIGLSPMP-----Q-HGVDVPOAMASHKQQAALGGGLVQARNFVMTGYNAGISSVKKRLRG--KEDVQSSMVAAFGSG
BrTric2 1 ---MGVGGEGEGRRGEMMAISSLFDNDQNIQDFVQKAEVITNFKWMSKQSTPVEAAVVTATSGELGGAIGMGLIGLSPMP-----Q-7--DPOAMASHKQQAALGGGLVQARNFVMTGYNAGISSVKKRLRG--KEDVQSSMVAAFGSG
BrTric3 1 -----MALIGGERRVTSGGDTHESSMKRISPTQYKIVSIVTFMTPGGVSGVAVLGGIIGTVMA-----PMHRRYPQQAALRRTOYA---RAYVLEGSVAIFAAGFIESMRRGIRG--KDDVTSRIVSASGGG
BrTric4 1 -----MGKDGDKVQETHAVMSLMKDOONPIQDFVQKAEVITNFKWMSKQSTPVEAAVVTATSGELGGAIGMGLIGLSPMP-----Q-HGVDVPOAMASHKQQAALGGGLVQARNFVMTGYNAGISSVKKRLRG--KEDVQSSMVAAFGSG
CruTric1 1 --MGVGGGGGGDQRRGGGEMMAMASLFDNDQNIQDFVQKAEVITNFKWMSKQSTPVEAAVVTATSGELGGAIGMGLIGLSPMP-----Q-HGVDVPOAMASHKQQAALGGGLVQARNFVMTGYNAGISSVKKRLRG--KEDVQSSMVAAFGSG
CruTric2 1 -----MAPLFAVAVPLGVESSFDPEKQKHWADWDQVAVVAVLGLQSSVGGVAGIEMGFSISAID--PTNGTAPRPNALDSSMMKGGPQWQARNFVMTGYNAGISSVKKRLRG--KEDVQSSMVAAFGSG
CreTric 1 -----MEQGGQGVVVKLPP---HONVPEIQIQAQKMKELNNGFQSMWKSQKSLAVEAAVVTATSATGGAAGTACMGILAPDISSSLTPPPD--HALNPQAMASHKQQAALGGGLVQARNFVMTGYNAGISSVKKRLRG--KEDVQSSMVAAFGSG
EgTric1 1 -----MEREKGVMTVSKLAP---QONPEIQIQAQKMKELNNGFQSMWKSQKSLAVEAAVVTATSATGGAAGTACMGILAPDISSSLTPPPD--HALNPQAMASHKQQAALGGGLVQARNFVMTGYNAGISSVKKRLRG--KEDVQSSMVAAFGSG
EgTric2 1 -----MEQKGRGIVVSKLPP---PNNPEIQIQAQKMKELNNGFQSMWKSQKSLAVEAAVVTATSATGGAAGTACMGILAPDISSSLTPPPD--HALNPQAMASHKQQAALGGGLVQARNFVMTGYNAGISSVKKRLRG--KEDVQSSMVAAFGSG
EgTric3 1 -----MEQKGRGIVVSKLPP---PNNPEIQIQAQKMKELNNGFQSMWKSQKSLAVEAAVVTATSATGGAAGTACMGILAPDISSSLTPPPD--HALNPQAMASHKQQAALGGGLVQARNFVMTGYNAGISSVKKRLRG--KEDVQSSMVAAFGSG
GmTric1 1 -----MEQAKQGIHVTS---OSQNPPEIQIQAQKMKELNNGFQSMWKSQKSLAVEAAVVTATSATGGAAGTACMGILAPDISSSLTPPPD--HALNPQAMASHKQQAALGGGLVQARNFVMTGYNAGISSVKKRLRG--KEDVQSSMVAAFGSG
GmTric2 1 -----MEQAKQGIHVTS---OSQNPPEIQIQAQKMKELNNGFQSMWKSQKSLAVEAAVVTATSATGGAAGTACMGILAPDISSSLTPPPD--HALNPQAMASHKQQAALGGGLVQARNFVMTGYNAGISSVKKRLRG--KEDVQSSMVAAFGSG
ZmTric1 1 MADGKGRNSAVALKTSP--SVPMARGLRGGSDPEEWSGKRVKAIAGFRAMNAKQPTHEAAVVTATSGVAGVGGAGLADGGSPFIQPP--SNANSDAMASFKQAQALAGGLVQARNFVMTGYNAGISSVKKRLRG--KEDVQSSMVAAFGSG
ZmTric2 1 --MERAGQRRPLTVMSSSSQVAARMGMTNPLAEWDRVRSLEAGFRAMNAKQPTHEAAVVTATSGVAGVGGAGLADGGSPFIQPP--PGTDKRVVLSFKQAQALAGGLVQARNFVMTGYNAGISSVKKRLRG--KEDVQSSMVAAFGSG
ZmTric3 1 MADGKGRNSAVALKTSPSSSVAAGLGRVSDPEEWSGKRVKAIAGFRAMNAKQPTHEAAVVTATSGVAGVGGAGLADGGSPFIQPP--FNANRPMASFKQAQALAGGLVQARNFVMTGYNAGISSVKKRLRG--KEDVQSSMVAAFGSG
VvTric1 1 -----MDEGKQGVMAAQNPIQAQKMKELNNGFQSMWKSQKSLAVEAAVVTATSATGGAAGTACMGILAPDISSSLTPPPD--HALNPQAMASHKQQAALAGGLVQARNFVMTGYNAGISSVKKRLRG--KEDVQSSMVAAFGSG
Ostric1 1 -----MEGMGQQRRLVVMAS---AQAAARGGANLAELELDRVRLTLAGLFRAMNAKQPTHEAAVVTATSGVAGVGGAGLADGGSPFIQPP--PGADNPMASFKQAQALAGGLVQARNFVMTGYNAGISSVKKRLRG--KEDVQSSMVAAFGSG
Ostric2 1 -----MEGKQGVMAVTKLPP---QONPEIQIQAQKMKELNNGFQSMWKSQKSLAVEAAVVTATSATGGAAGTACMGILAPDISSSLTPPPD--HALNPQAMASHKQQAALAGGLVQARNFVMTGYNAGISSVKKRLRG--KEDVQSSMVAAFGSG
StTric 1 -----MEGKQGVMAVTKLPP---QONPEIQIQAQKMKELNNGFQSMWKSQKSLAVEAAVVTATSATGGAAGTACMGILAPDISSSLTPPPD--HALNPQAMASHKQQAALAGGLVQARNFVMTGYNAGISSVKKRLRG--KEDVQSSMVAAFGSG
PpTric1 1 -----MQAATNKADGNTQMIQLKVKLSDDLVWVKKQPAAEVAVVVTAGVAGVGGAGLADGGSPFIQPP--FOLNPMASFKQAQALAGGLVQARNFVMTGYNAGISSVKKRLRG--KEDVQSSMVAAFGSG
PpTric2 1 -----MEQKQGVVTKLPP---NDDPKVLFQKVKELDGGKSMWKSQKSLAVEAAVVTATSGVAGVGGAGLADGGSPFIQPP--HALNPQAMASHKQQAALAGGLVQARNFVMTGYNAGISSVKKRLRG--KEDVQSSMVAAFGSG
PpTric3 1 -----MEQKQGVVTKLPP---NDDPKVLFQKVKELDGGKSMWKSQKSLAVEAAVVTATSGVAGVGGAGLADGGSPFIQPP--HALNPQAMASHKQQAALAGGLVQARNFVMTGYNAGISSVKKRLRG--KEDVQSSMVAAFGSG
VcTric 1 -----MALPFAVAVPLGVEVKSDELGKRYQDWLAGQDVAVQVLLGLQSGVAVGGVGVVMPGFSISFD--PNNQ-GAAPSNPALESVVKAGPQSGARNFVMTGYNAGISSVKKRLRG--KEDVQSSMVAAFGSG

```

```

RcTric 145 NMFSLVSGMGGPNQANAVTSGLFFALVGGGLVQGGKQKFSOPPAEDLDFVSRTRSMLSLGLQNKYKKNFKKGLLDDTLPLLLTDS--ALRDVIPPGRRLIILDHIQ--RDPELKERRRGHG-----
SmTric 133 AGLFSLVSGMGGPNQANAVTSGLFFALVGGGLVQGGKQKFSOPPAEDLDFVSRTRSMLSLGLQNKYKKNFKKGLLDDTLPLLLTDS--ALRDVIPPGRRLIILDHIQ--RSPRAHIV-----
AtTric1 149 FAYSLVSGMGGPNQANAVTSGLFFALVGGGLVQGGKQKFSOPPAEDLDFVSRTRSMLSLGLQNKYKKNFKKGLLDDTLPLLLTDS--ALRDVIPPGRRLIILDHIQ--RDPELKERRRGHG-----
AtTric2 144 FAYSLVSGMGGPNQANAVTSGLFFALVGGGLVQGGKQKFSOPPAEDLDFVSRTRSMLSLGLQNKYKKNFKKGLLDDTLPLLLTDS--ALRDVIPPGRRLIILDHIQ--RDPELKERRRGHG-----
BrTric1 148 FAYSLVSGMGGPNQANAVTSGLFFALVGGGLVQGGKQKFSOPPAEDLDFVSRTRSMLSLGLQNKYKKNFKKGLLDDTLPLLLTDS--ALRDVIPPGRRLIILDHIQ--RDPELKERRRGHG-----
BrTric2 144 FAYSLVSGMGGPNQANAVTSGLFFALVGGGLVQGGKQKFSOPPAEDLDFVSRTRSMLSLGLQNKYKKNFKKGLLDDTLPLLLTDS--ALRDVIPPGRRLIILDHIQ--RDPELKERRRGHG-----
BrTric3 121 LAYSFLAV--KGLTGGFAHAFPSAYVVAASG---TATIKSRNAODAFVTEKNAISKLGLEEKYKKNFKKGLLDDTLPLLLTDS--VLOQVIPPGRRLIILDHIQ--RFYKLSLYSMDQIYET-----
BrTric4 21 LAYSFLAV--KGLKVPFAHAFPSAYVVAASG---TATIKSRNAODAFVTEKNAISKLGLEEKYKKNFKKGLLDDTLPLLLTDS--VLOQVIPPGRRLIILDHIQ--RFYKLSLYSMDQIYET-----
CruTric1 143 FAYSLVSGMGGPNQANAVTSGLFFALVGGGLVQGGKQKFSOPPAEDLDFVSRTRSMLSLGLQNKYKKNFKKGLLDDTLPLLLTDS--ALRDVIPPGRRLIILDHIQ--RDPELKERRRGHG-----
CruTric2 150 FAYSLVSGMGGPNQANAVTSGLFFALVGGGLVQGGKQKFSOPPAEDLDFVSRTRSMLSLGLQNKYKKNFKKGLLDDTLPLLLTDS--ALRDVIPPGRRLIILDHIQ--RDPELKERRRGHG-----
CreTric 130 VAYSFLVSGMGGPNQANAVTSGLFFALVGGGLVQGGKQKFSOPPAEDLDFVSRTRSMLSLGLQNKYKKNFKKGLLDDTLPLLLTDS--ALRDVIPPGRRLIILDHIQ--RNPVSVLRFALPLPLPPPPPPMAAAAGASGR
EgTric1 145 NMFSLVSGMGGPNQANAVTSGLFFALVGGGLVQGGKQKFSOPPAEDLDFVSRTRSMLSLGLQNKYKKNFKKGLLDDTLPLLLTDS--ALRDVIPPGRRLIILDHIQ--RDPELKERRRGHG-----
EgTric2 144 NMFSLVSGMGGPNQANAVTSGLFFALVGGGLVQGGKQKFSOPPAEDLDFVSRTRSMLSLGLQNKYKKNFKKGLLDDTLPLLLTDS--ALRDVIPPGRRLIILDHIQ--RDPELKERRRGHG-----
EgTric3 9 NMFSLVSGMGGPNQANAVTSGLFFALVGGGLVQGGKQKFSOPPAEDLDFVSRTRSMLSLGLQNKYKKNFKKGLLDDTLPLLLTDS--ALRDVIPPGRRLIILDHIQ--RDPELKERRRGHG-----
GmTric1 144 NMFSLVSGMGGPNQANAVTSGLFFALVGGGLVQGGKQKFSOPPAEDLDFVSRTRSMLSLGLQNKYKKNFKKGLLDDTLPLLLTDS--ALRDVIPPGRRLIILDHIQ--RDPELKERRRGHG-----
GmTric2 144 NMFSLVSGMGGPNQANAVTSGLFFALVGGGLVQGGKQKFSOPPAEDLDFVSRTRSMLSLGLQNKYKKNFKKGLLDDTLPLLLTDS--ALRDVIPPGRRLIILDHIQ--RDPELKERRRGHG-----
GmTric3 158 NMFSLVSGMGGPNQANAVTSGLFFALVGGGLVQGGKQKFSOPPAEDLDFVSRTRSMLSLGLQNKYKKNFKKGLLDDTLPLLLTDS--ALRDVIPPGRRLIILDHIQ--RDPELKERRRGHG-----
ZmTric1 158 NMFSLVSGMGGPNQANAVTSGLFFALVGGGLVQGGKQKFSOPPAEDLDFVSRTRSMLSLGLQNKYKKNFKKGLLDDTLPLLLTDS--ALRDVIPPGRRLIILDHIQ--RDPELKERRRGHG-----
ZmTric2 158 NMFSLVSGMGGPNQANAVTSGLFFALVGGGLVQGGKQKFSOPPAEDLDFVSRTRSMLSLGLQNKYKKNFKKGLLDDTLPLLLTDS--ALRDVIPPGRRLIILDHIQ--RDPELKERRRGHG-----
ZmTric3 159 NMFSLVSGMGGPNQANAVTSGLFFALVGGGLVQGGKQKFSOPPAEDLDFVSRTRSMLSLGLQNKYKKNFKKGLLDDTLPLLLTDS--ALRDVIPPGRRLIILDHIQ--RDPELKERRRGHG-----
VvTric1 56 NMFSLVSGMGGPNQANAVTSGLFFALVGGGLVQGGKQKFSOPPAEDLDFVSRTRSMLSLGLQNKYKKNFKKGLLDDTLPLLLTDS--ALRDVIPPGRRLIILDHIQ--RDPELKERRRGHG-----
VvTric2 140 NMFSLVSGMGGPNQANAVTSGLFFALVGGGLVQGGKQKFSOPPAEDLDFVSRTRSMLSLGLQNKYKKNFKKGLLDDTLPLLLTDS--ALRDVIPPGRRLIILDHIQ--RDPELKERRRGHG-----
Ostric1 60 NMFSLVSGMGGPNQANAVTSGLFFALVGGGLVQGGKQKFSOPPAEDLDFVSRTRSMLSLGLQNKYKKNFKKGLLDDTLPLLLTDS--ALRDVIPPGRRLIILDHIQ--RDPELKERRRGHG-----
Ostric2 154 NMFSLVSGMGGPNQANAVTSGLFFALVGGGLVQGGKQKFSOPPAEDLDFVSRTRSMLSLGLQNKYKKNFKKGLLDDTLPLLLTDS--ALRDVIPPGRRLIILDHIQ--RDPELKERRRGHG-----
MTric 147 NMFSLVSGMGGPNQANAVTSGLFFALVGGGLVQGGKQKFSOPPAEDLDFVSRTRSMLSLGLQNKYKKNFKKGLLDDTLPLLLTDS--ALRDVIPPGRRLIILDHIQ--RDPELKERRRGHG-----
StTric 147 NMFSLVSGMGGPNQANAVTSGLFFALVGGGLVQGGKQKFSOPPAEDLDFVSRTRSMLSLGLQNKYKKNFKKGLLDDTLPLLLTDS--ALRDVIPPGRRLIILDHIQ--RDPELKERRRGHG-----
PpTric1 78 NMFSLVSGMGGPNQANAVTSGLFFALVGGGLVQGGKQKFSOPPAEDLDFVSRTRSMLSLGLQNKYKKNFKKGLLDDTLPLLLTDS--ALRDVIPPGRRLIILDHIQ--RDPELKERRRGHG-----
PpTric2 137 NMFSLVSGMGGPNQANAVTSGLFFALVGGGLVQGGKQKFSOPPAEDLDFVSRTRSMLSLGLQNKYKKNFKKGLLDDTLPLLLTDS--ALRDVIPPGRRLIILDHIQ--RDPELKERRRGHG-----
PpTric3 147 NMFSLVSGMGGPNQANAVTSGLFFALVGGGLVQGGKQKFSOPPAEDLDFVSRTRSMLSLGLQNKYKKNFKKGLLDDTLPLLLTDS--ALRDVIPPGRRLIILDHIQ--RDPELKERRRGHG-----
VcTric 128 VAYSFLVSGMGGPNQANAVTSGLFFALVGGGLVQGGKQKFSOPPAEDLDFVSRTRSMLSLGLQNKYKKNFKKGLLDDTLPLLLTDS--ALRDVIPPGRRLIILDHIQ--RNPVSVLRFALPLPLPPPPPPMAAAAGASGR

```

**Figure S1. Protein sequence alignment.** Multiple sequence alignment (Clustal Omega) of all Tric orthologs from 17 plant species and algae (red, green and brown), with plant species chosen as representatives of each evolutionary clade from *Physcomitrella patens* (Pp) to *Eucalyptus grandis*, (Eg). Abbreviations: Br = *Brassica rapa*, Cru = *Capsella rubella*, Cre = *Chlamydomonas reinhardtii*, Cs = *Cucumis sativus*, Dm = *Drosophila melanogaster*, Eg = *Eucalyptus grandis*, Gm = *Glycine max*, Mt = *Medicago truncatula*, Os = *Oryza sativa*, Pp = *Physcomitrella patens*, Pt = *Populus Trichocarpa*, Rc = *Ricinus communis*, Sc = *Saccharomyces cerevisiae*, Sm = *Selaginella moellendorffii*, St = *Solanum tuberosum*, Vv = *Vitis Vinifera*, Vc = *Volvox carteri*, Zm = *Zea mays*.
