# Supplementary material
Source: PubMed Central journal article supplement (PMC5129730)
Supplement: supp_pp.16.01519_PP2016-01519DR1_Supplemental_Figure_2.pdf [file supp_pp.16.01519_PP2016-01519DR1_Supplemental_Figure_2.pdf]

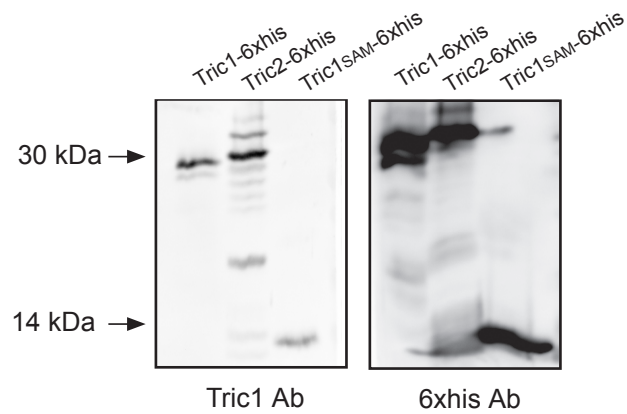

**Supplemental Figure 2. Testing specificity of Tric1 antibody.** 6xhistidine tagged Tric1, Tric2 and Tric1SAM were expressed in bacteria and immunodetected with antibodies raised against Tric1. To ensure equal abundance of recombinant proteins, samples were initially immunodetected with 6xHis antisera.
