# Supplementary material
Source: PubMed Central journal article supplement (PMC5129730)
Supplement: supp_pp.16.01519_PP2016-01519DR1_Supplemental_Figure_3.pdf [file supp_pp.16.01519_PP2016-01519DR1_Supplemental_Figure_3.pdf]

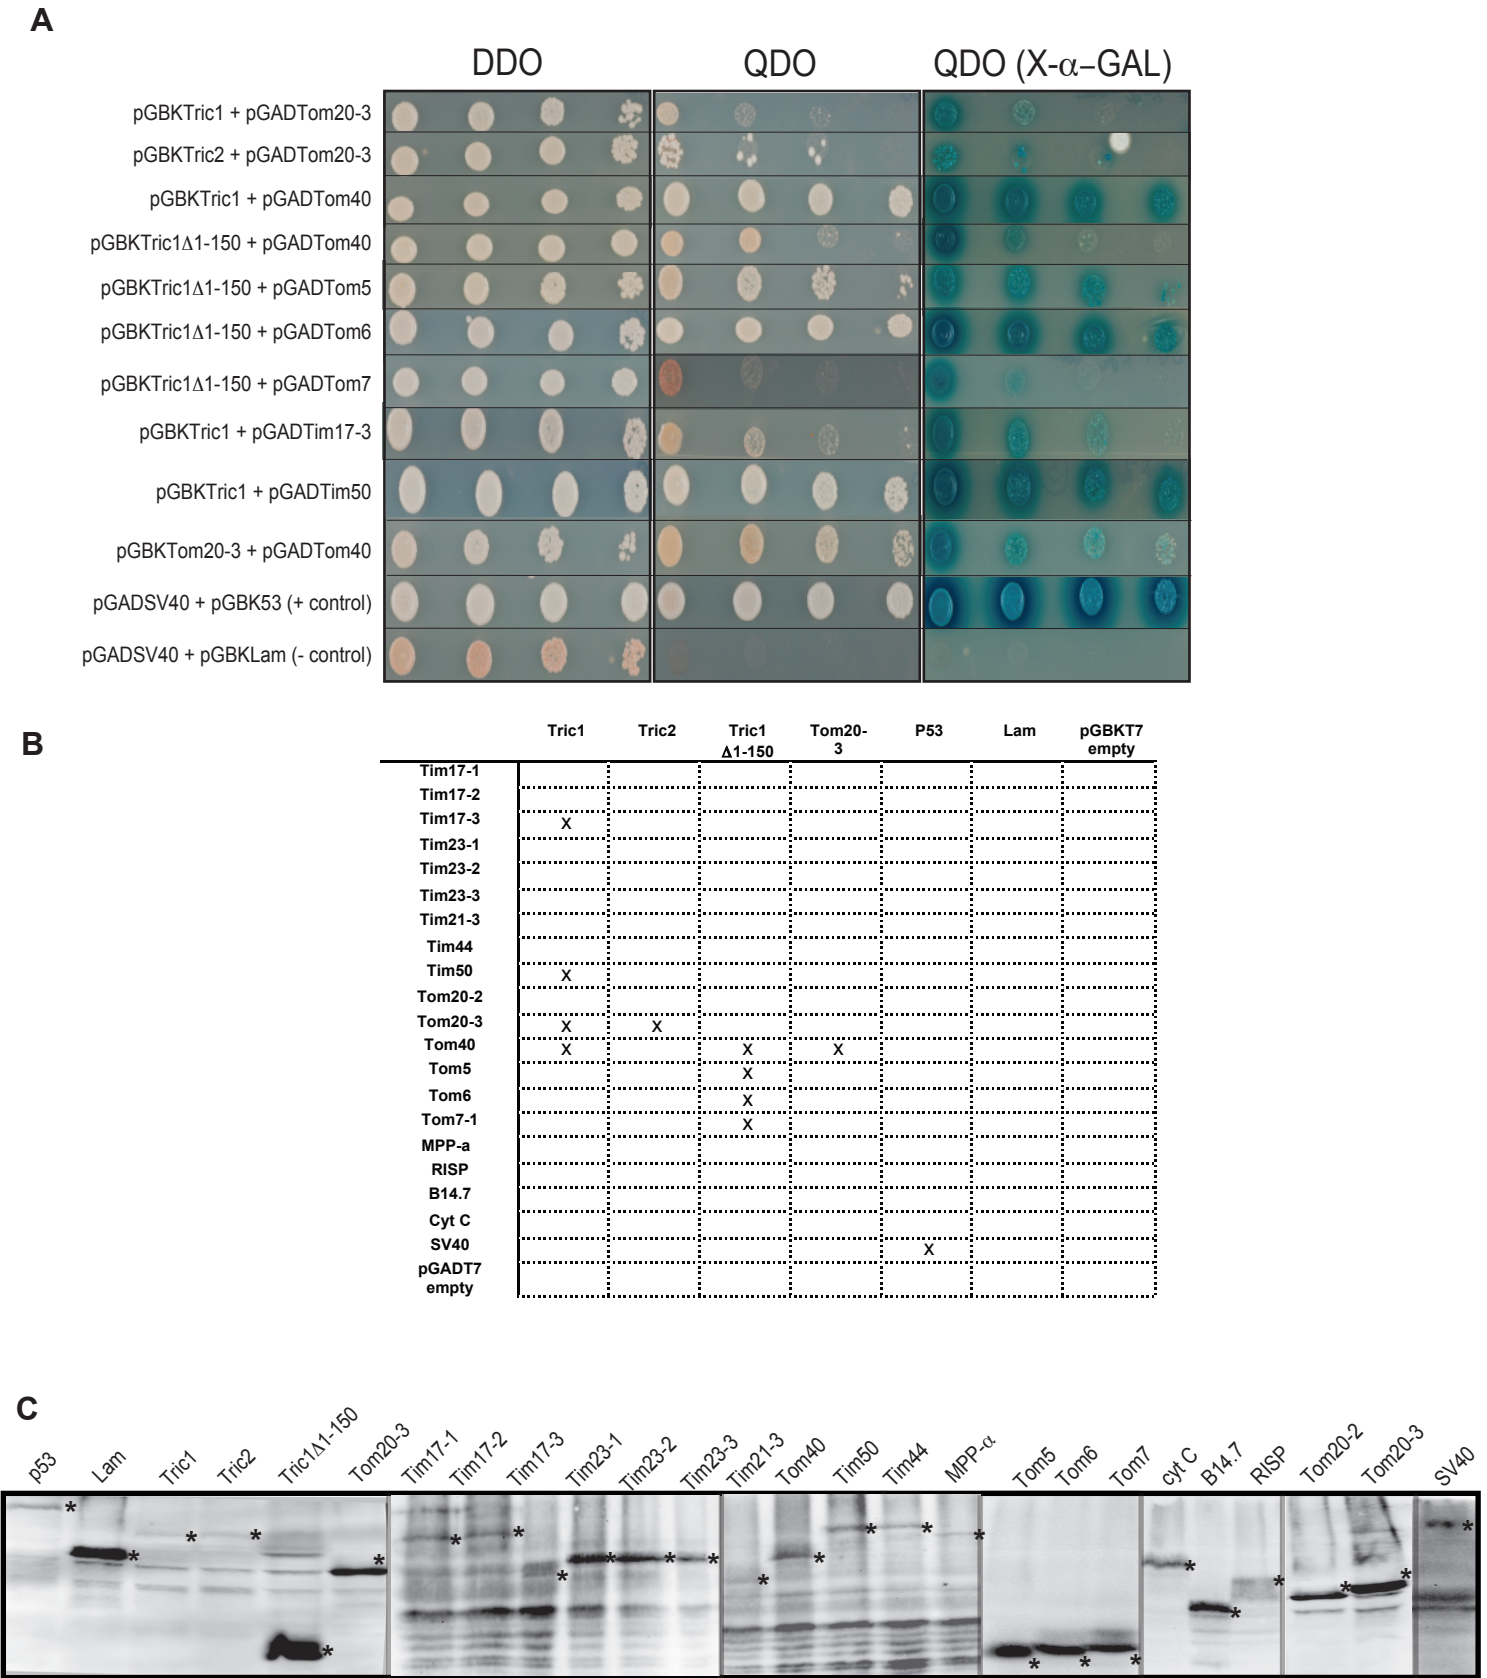

**Figure S3. Y2H interactions of Tric with subunits of the protein import apparatus. A.** Positive Yeast-2-Hybrid interaction assays of Tric1, Tric2 and the SAM domain of Tric1 ( $\Delta$ 1-150) cloned into pGBK and transformed into AH109 mated against various subunits of the TOM and TIM17:23 complex cloned into pGAD and transformed into Y187. Successful diploid mating was determined by growth on Double Drop-Out media (DDO, SD-leu-trp) whilst positive interactors were determined by growth on Quadruple Drop-Out media (QDO, SD-leu-trp-ade-his) with or without the addition of X- $\alpha$ -GAL. **B.** Table representing all the interactions that were tested with pGBKT7 clones listed on the top and pGADT7 clones listed on the right. Positive interactors are indicated by X. **C.** Immunodetection of all yeast transformants to confirm protein expression as detected by anti-c-myc (pGBKT7) and anti-HA (pGADT7). The band corresponding to the specific protein is indicated by a \*.
