# Supplementary material
Source: PubMed Central journal article supplement (PMC5129730)
Supplement: supp_pp.16.01519_PP2016-01519DR1_Supplemental_Figure_5.pdf [file supp_pp.16.01519_PP2016-01519DR1_Supplemental_Figure_5.pdf]

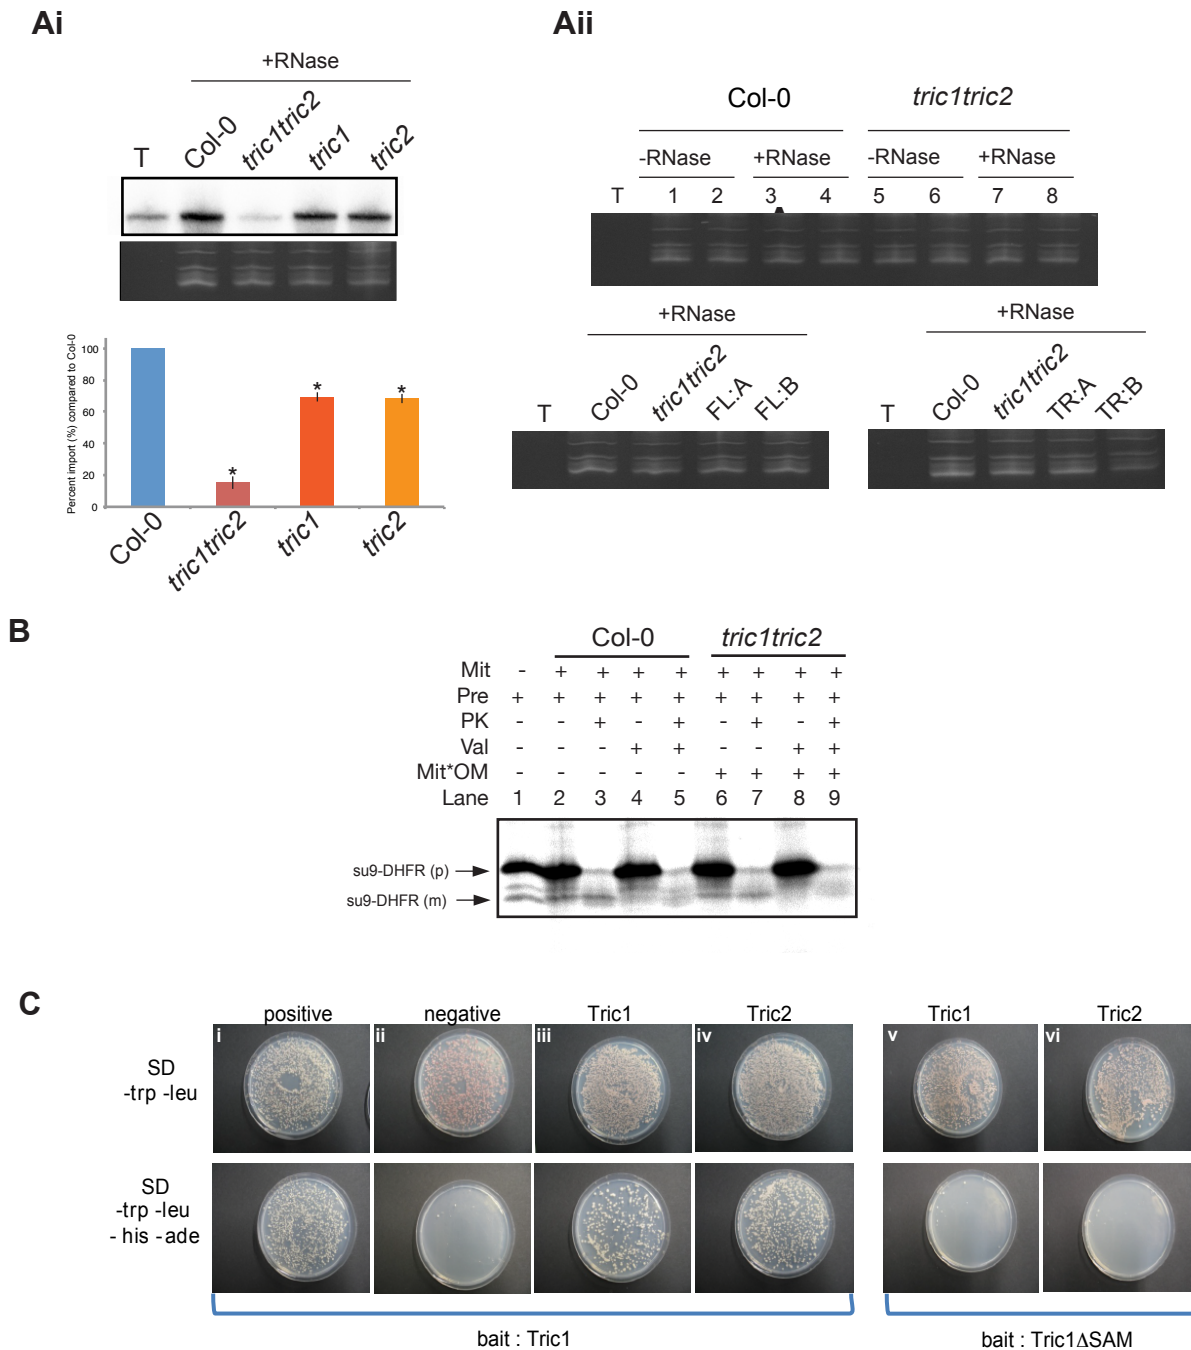

**Figure S5. A. tRNA import assays into mitochondria isolated from *tric1*, *tric2* and *tric1tric2*.** **Ai**,  $^{32}$ P-labeled plant cytosolic tRNA<sup>Ala</sup> was incubated with mitochondria under conditions that support tRNA uptake into mitochondria. i) Lane T, the radiolabeled probe represents 10% of that added to the uptake assay. Mitochondria were treated with RNase after the uptake assay to remove all labeled probe outside mitochondria. Quantification of the probe intensity from mitochondria relative to wild type is graphed below (as a percentage relative to Col-0, where Col-0 is 100%). **Aii** Ethidium bromide staining of total mitochondrial RNA extracted from isolated mitochondria used in the tRNA import assays as seen in Fig. 3. **B**, Protein uptake of Su9-DHFR, tRNA carrier protein. Lane 1, precursor protein, lane 2, precursor protein incubated with isolated mitochondria, lane 3, as lane 2 with the addition of Proteinase K (PK), lane 4 and 5, as lanes 2 and 3 except with the addition of valinomycin. Lanes 6-9 as lanes 2-5 except mitochondria was isolated from *tric1tric2*. **C**, The SAM domain is necessary for oligomerisation of Tric proteins. Yeast Split Ubiquitin interaction assay of Tric1, Tric2 and Tric2 $\Delta$ SAM constructs. Control plates (SD-trp-leu) are depicted on the top panel and interaction selection plates (SD-trp-leu-his-ade) are in the lower panel.
