# Supplementary material
Source: PubMed Central journal article supplement (PMC5129730)
Supplement: supp_pp.16.01519_PP2016-01519DR1_Supplemental_Figure_6.pdf [file supp_pp.16.01519_PP2016-01519DR1_Supplemental_Figure_6.pdf]

## Metabolism overview

### seedling

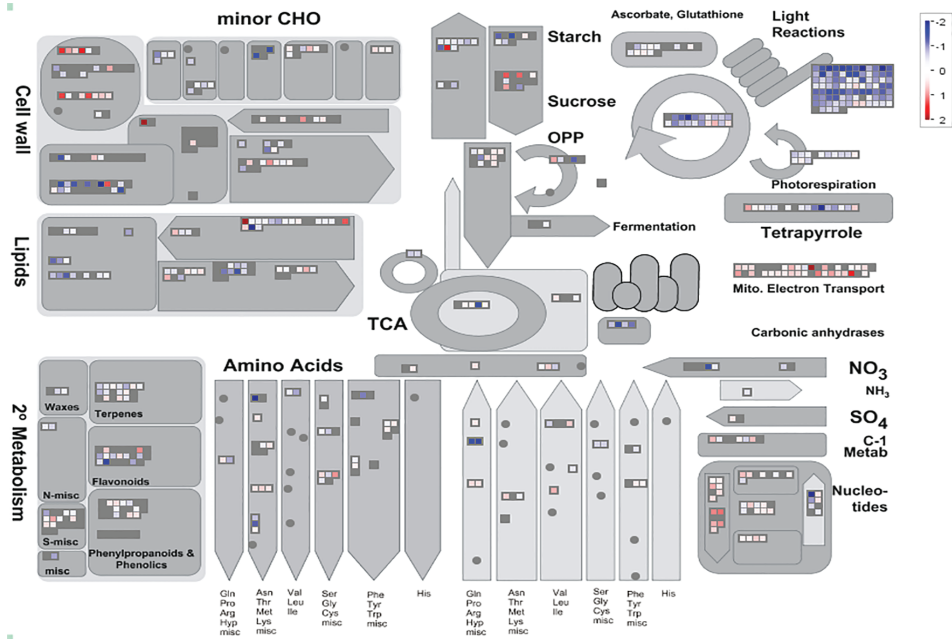

### rosette

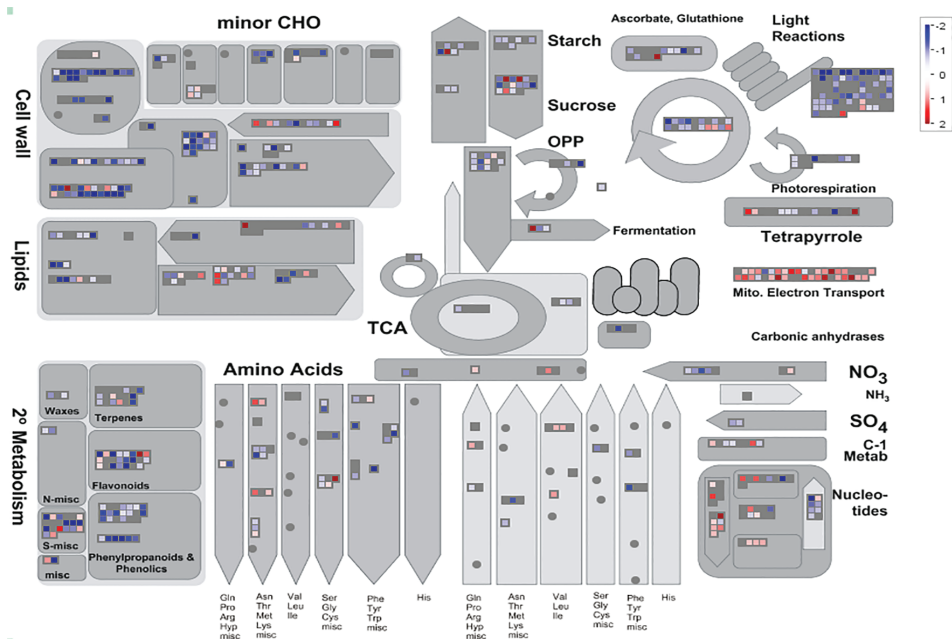

**Figure S6.** Mapman general metabolism overview of genes modulated in the *tric1tric2* line compared to Col-0 from 2 week old seedlings and 4 week old rosette leaves. Red and blue indicate lower and higher expression levels relative to Col-0. Scale bar shown in log<sub>2</sub>.
