# Supplementary material
Source: PubMed Central journal article supplement (PMC5129730)
Supplement: supp_pp.16.01519_PP2016-01519DR1_Supplemental_Figure_7.pdf [file supp_pp.16.01519_PP2016-01519DR1_Supplemental_Figure_7.pdf]

# Fold-change (Col-0 v *tricitric2*)

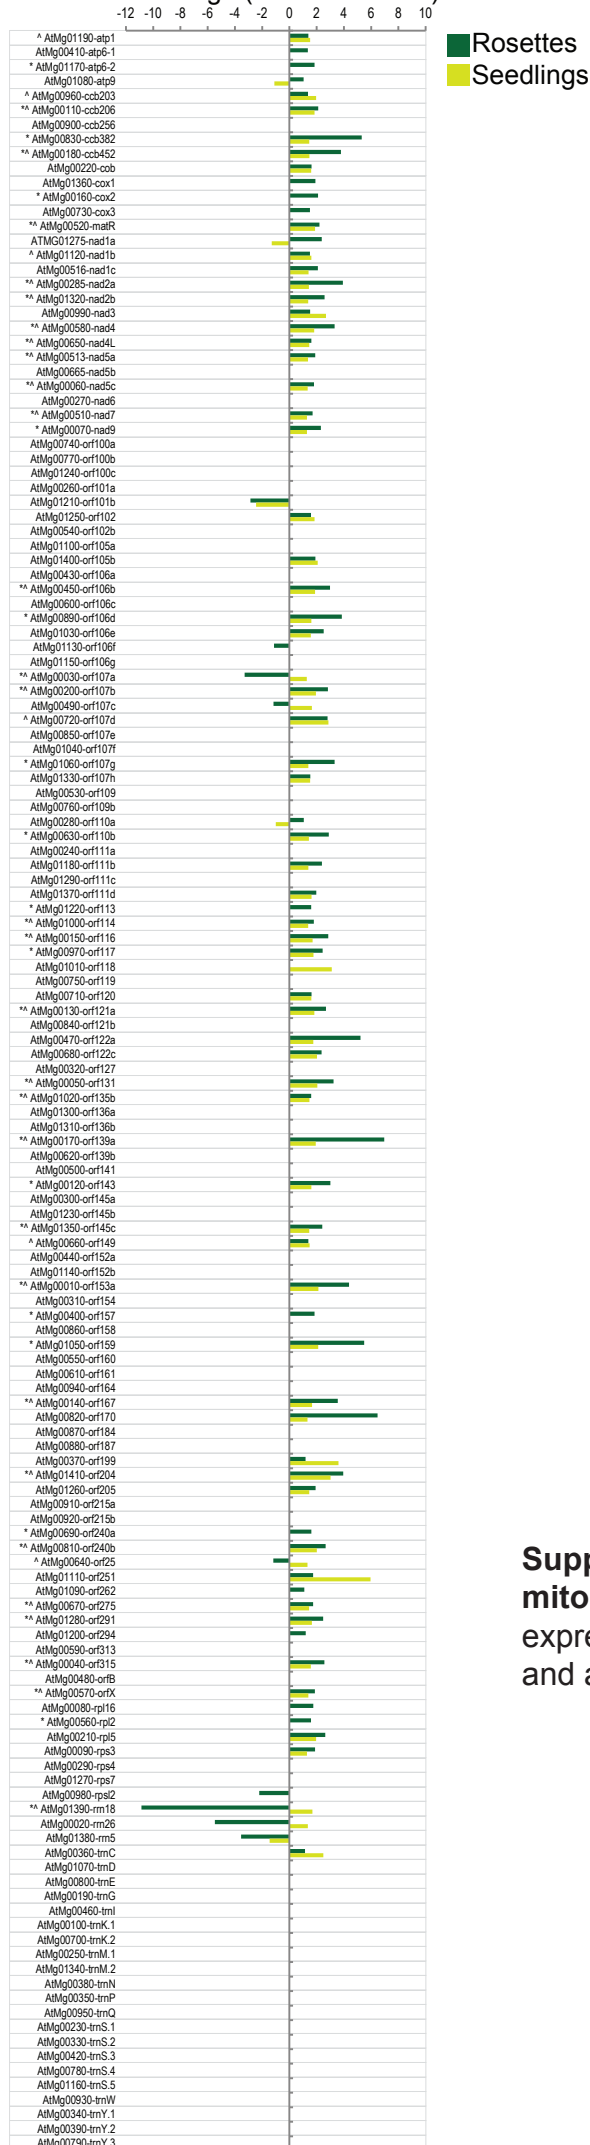

**Supplemental Figure 7. Fold-change responses of 146 mitochondrial encoded genes.** Significant differential expression is indicated by an asterisk\* for the rosettes (green) and a cap^ for the seedlings (yellow).
