# Supplementary material
Source: PubMed Central journal article supplement (PMC5129730)
Supplement: supp_pp.16.01519_PP2016-01519DR1_Supplemental_Table_1.pdf [file supp_pp.16.01519_PP2016-01519DR1_Supplemental_Table_1.pdf]

1  
2

| <b>A</b>                 | <b>no. cells</b> | <b>no. mitochondria</b> | <b>(i) normal normal</b> | <b>(ii) normal spheroid</b> | <b>(iii) <math>\geq</math> double spheroid</b> |
|--------------------------|------------------|-------------------------|--------------------------|-----------------------------|------------------------------------------------|
| <b>Col-0</b>             | 279              | 512                     | 502 (98.0 %)             | 10 (2.0 %)                  | 0                                              |
| <b><i>tric1tric2</i></b> | 161              | 442                     | 224 (50.7 %)             | 11 (2.5 %)                  | 207 (46.7 %)                                   |

  

| <b>B</b>                 | <b>no. mitochondria</b> | <b>(i) well</b> | <b>(ii) not well</b> | <b>(iii) periphery</b> | <b>(iv) no cristae</b> |
|--------------------------|-------------------------|-----------------|----------------------|------------------------|------------------------|
| <b>Col-0</b>             | 224                     | 224 (100 %)     | 0                    | 0                      | 0                      |
| <b><i>tric1tric2</i></b> | 64                      | 6 (9,4 %)       | 6 (9,4 %)            | 45 (70,3 %)            | 7 (10,9 %)             |

3

4 **Table S1.** Analysis of mitochondria morphology in *tric1tric2* mutant and Col-0 wild  
5 type. Morphology of mitochondria was analyzed in multiple, independent  
6 transmission electron micrograph (TEM) pictures on mature rosette leaves of  
7 *tric1tric2* and Col-0 wild-type plants as described in Figure 6. **A**, General analysis of  
8 size and shape. The total number (no.) of all mitochondria analyzed was subdivided  
9 into those with (i) normal wild-type size and shape, (ii) normal size but spheroidal  
10 shape, (iii) at least doubled in size with a spheroidal shape. **B**, Cristae analysis, the  
11 cristae structure of mitochondria was subdivided into categories (i) well-developed,  
12 (ii) not well-developed, but present across the entire organelle, (iii) visible cristae only  
13 at periphery of mitochondria, (iv) no cristae detectable. Please note that not all  
14 mitochondria pictures displayed suitable resolution for cristae analysis. Therefore, the  
15 total amount of mitochondria analysed in **B** is less than **A**.
